# Supplementary material
Source: Springer Nature journal article supplement (https://www.springermedizin.de/resource/supplementary/13023_2009_324_MOESM5_ESM.pdf/9642112)

### Family 1

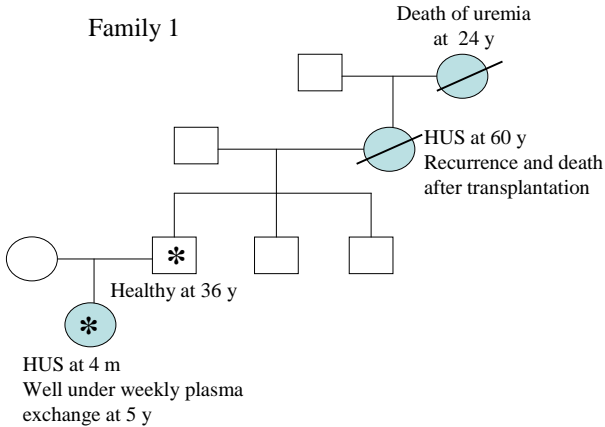

### Family 2

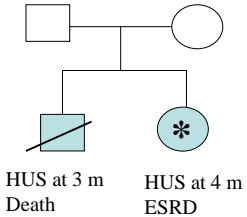

Supplement: MOESM5 [file 9642112]
